# Supplementary material for: Stabilisation of lanthanum nickelate electrocatalysts via Pt doping for high-current-density rechargeable zinc–air batteries
Source: Royal Society of Chemistry journal article supplement (doi:10.1039/d5ta07459b), 2025-12-23
Supplement: d5ta07459b1.pdf [file d5ta07459b1.pdf]

## Electronic Supplementary Information for

### Stabilisation of Lanthanum Nickelate Electrocatalysts via Pt-doping for High Current Density Rechargeable Zinc-Air Battery

Wei Jian Sim,<sup>a</sup> Mai Thanh Nguyen,<sup>b,\*</sup> Wathanyu Kao-ian,<sup>c</sup> Pinit Kidkhunthod,<sup>c,d</sup> Te-Wei Chiu,<sup>e</sup> Soorathep Khaewhom,<sup>c</sup> Ying-Chih Pu,<sup>f</sup> and Tetsu Yonezawa<sup>b,c,\*</sup>

<sup>a</sup>Graduate School of Engineering, Hokkaido University, Kita 13 Nishi 8, Kita-ku, Sapporo, Hokkaido 060-8628, Japan

<sup>b</sup>Division of Materials Science and Engineering, Faculty of Engineering, Hokkaido University, Kita 13 Nishi 8, Kita-ku, Sapporo, Hokkaido 060-8628, Japan

<sup>c</sup>Department of Chemical Engineering, Faculty of Engineering, Chulalongkorn University, Payathai Road Pathumwan, Bangkok 10330, Thailand

<sup>d</sup>Synchrotron Light Research Institute, 111 University Avenue, Muang District, Nakhon Ratchasima 30000, Thailand

<sup>e</sup>Department of Materials and Mineral Resources Engineering, National Taipei University of Technology, Taipei 10608, Taiwan

<sup>f</sup>Department of Materials Science, National Tainan University, Tainan 70005, Taiwan

\*Corresponding Author, email: mai\_nt@eng.hokudai.ac.jp, tetsu@eng.hokudai.ac.jp

#### Table of content

**Figure S1.** XRD patterns of LaNiO<sub>3</sub> (blue), LaNi<sub>0.95</sub>Pd<sub>0.05</sub>O<sub>3</sub> (orange), LaNi<sub>0.95</sub>Pt<sub>0.05</sub>O<sub>3</sub> (green), LaNi<sub>0.80</sub>Pt<sub>0.20</sub>O<sub>3</sub> (red). Patterns of rhombohedral LaNiO<sub>3</sub> (ICDD #033-0711), cubic LaNiO<sub>3</sub> (ICDD #033-0710) and platinum metal (ICDD #004-0802) included as reference.

**Figure S2.** Close-up of XRD patterns around (110) of LaNiO<sub>3</sub> (blue), LaNi<sub>0.95</sub>Pd<sub>0.05</sub>O<sub>3</sub> (orange), LaNi<sub>0.95</sub>Pt<sub>0.05</sub>O<sub>3</sub> (green), LaNi<sub>0.80</sub>Pt<sub>0.20</sub>O<sub>3</sub> (red). Patterns of rhombohedral LaNiO<sub>3</sub> (ICDD #033-0711) and cubic LaNiO<sub>3</sub> (ICDD #033-0710) included as reference.

**Figure S3.** Diffraction patterns and EDS spectra of the circled area on Figure 3. Top: LaNiO<sub>3</sub>. Middle: LaNi<sub>0.95</sub>Pd<sub>0.05</sub>O<sub>3</sub>. Bottom: LaNi<sub>0.95</sub>Pt<sub>0.05</sub>O<sub>3</sub>. Cu signals are due to the use of copper TEM grid.

**Figure S4.** HAADF image of (left to right) LaNiO<sub>3</sub>, LaNi<sub>0.95</sub>Pd<sub>0.05</sub>O<sub>3</sub>, LaNi<sub>0.95</sub>Pt<sub>0.05</sub>O<sub>3</sub>, LaNi<sub>0.80</sub>Pt<sub>0.20</sub>O<sub>3</sub>

**Figure S5.** Extended plot of ZAB cycling test with LaNiO<sub>3</sub>, LaNi<sub>0.95</sub>Pt<sub>0.05</sub>O<sub>3</sub> and Pt/C IrO<sub>2</sub> included as reference. ZAB cycling tests for the perovskite catalysts were stopped after 43 cycles as discharging was no longer achieving 60 mA cm<sup>-2</sup>.

**Figure S6.** Long-term stability test by CV for LaNiO<sub>3</sub>. Cycle numbers from 1 to 5000 are indicated by the colours in the legend.

**Figure S7.** Long-term stability test by CV for LaNi<sub>0.95</sub>Pt<sub>0.05</sub>O<sub>3</sub>. Cycle numbers from 1 to 5000 are indicated by the colours in the legend.

**Figure S8.** Long-term stability test by CV for reference catalyst Pt/C + IrO<sub>2</sub>. Cycle numbers from 1 to 5000 are indicated by the colours in the legend.

**Figure S9.** OER LSV of LaNiO<sub>3</sub> (blue), LaNi<sub>0.95</sub>Pt<sub>0.05</sub>O<sub>3</sub> (red) and Pt/C + IrO<sub>2</sub> (green) before and after long-term stability tests.

## 1. Goldschmidt Tolerance Factor

**Table S1.** Ionic radii and calculated Goldschmidt Tolerance Factor for each sample

## 2. ORR Mechanism determination with Rotating Ring Disc Electrode (RRDE)

## 3. Fitted EXAFS parameters

**Table S2.** Structural parameters by EXAFS fitting of  $\text{LaNiO}_3$ ,  $\text{LaNi}_{0.95}\text{Pt}_{0.05}\text{O}_3$  and  $\text{LaNi}_{0.95}\text{Pd}_{0.05}\text{O}_3$  based on the Ni-O coordination number of 6 and La-O coordination number of 12.

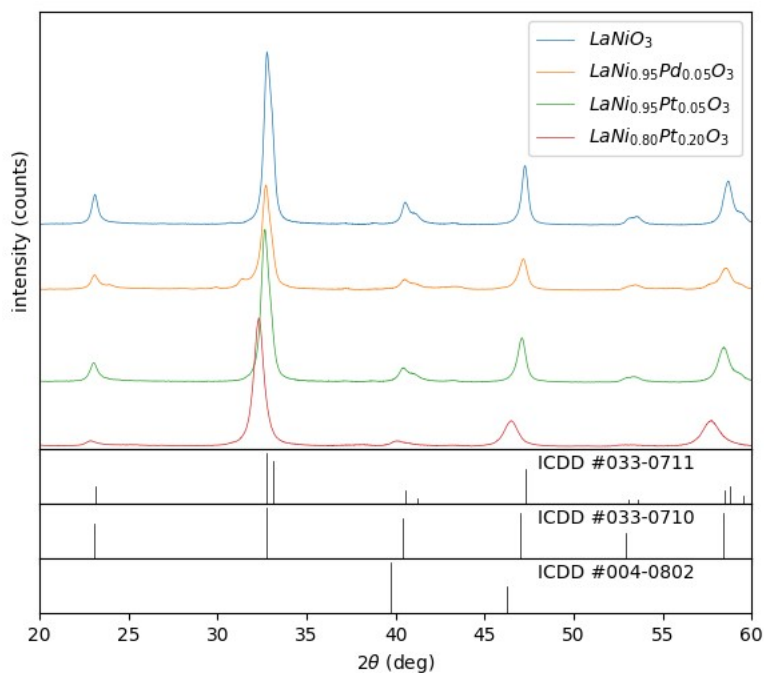

**Figure S1.** XRD patterns of  $\text{LaNiO}_3$  (blue),  $\text{LaNi}_{0.95}\text{Pd}_{0.05}\text{O}_3$  (orange),  $\text{LaNi}_{0.95}\text{Pt}_{0.05}\text{O}_3$  (green),  $\text{LaNi}_{0.80}\text{Pt}_{0.20}\text{O}_3$  (red). Patterns of rhombohedral  $\text{LaNiO}_3$  (ICDD #033-0711), cubic  $\text{LaNiO}_3$  (ICDD #033-0710) and platinum metal (ICDD #004-0802) included as reference.

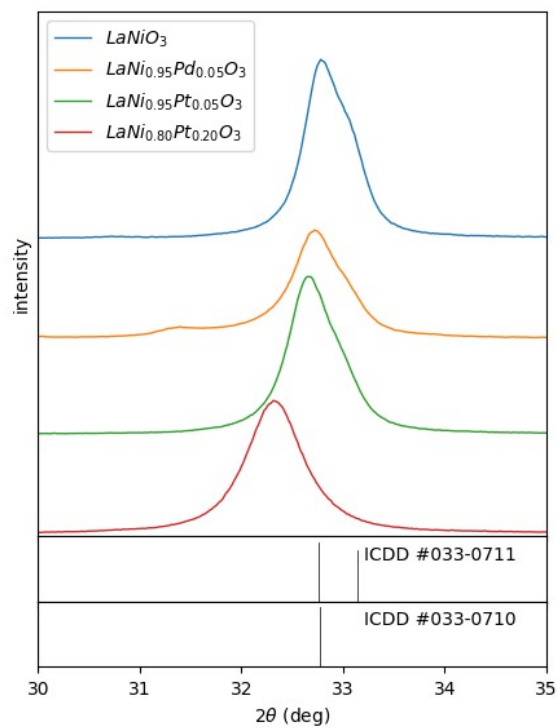

**Figure S2.** Close-up of XRD patterns around (110) of  $\text{LaNiO}_3$  (blue),  $\text{LaNi}_{0.95}\text{Pd}_{0.05}\text{O}_3$  (orange),  $\text{LaNi}_{0.95}\text{Pt}_{0.05}\text{O}_3$  (green),  $\text{LaNi}_{0.80}\text{Pt}_{0.20}\text{O}_3$  (red). Patterns of rhombohedral  $\text{LaNiO}_3$  (ICDD #033-0711) and cubic  $\text{LaNiO}_3$  (ICDD #033-0710) included as reference.

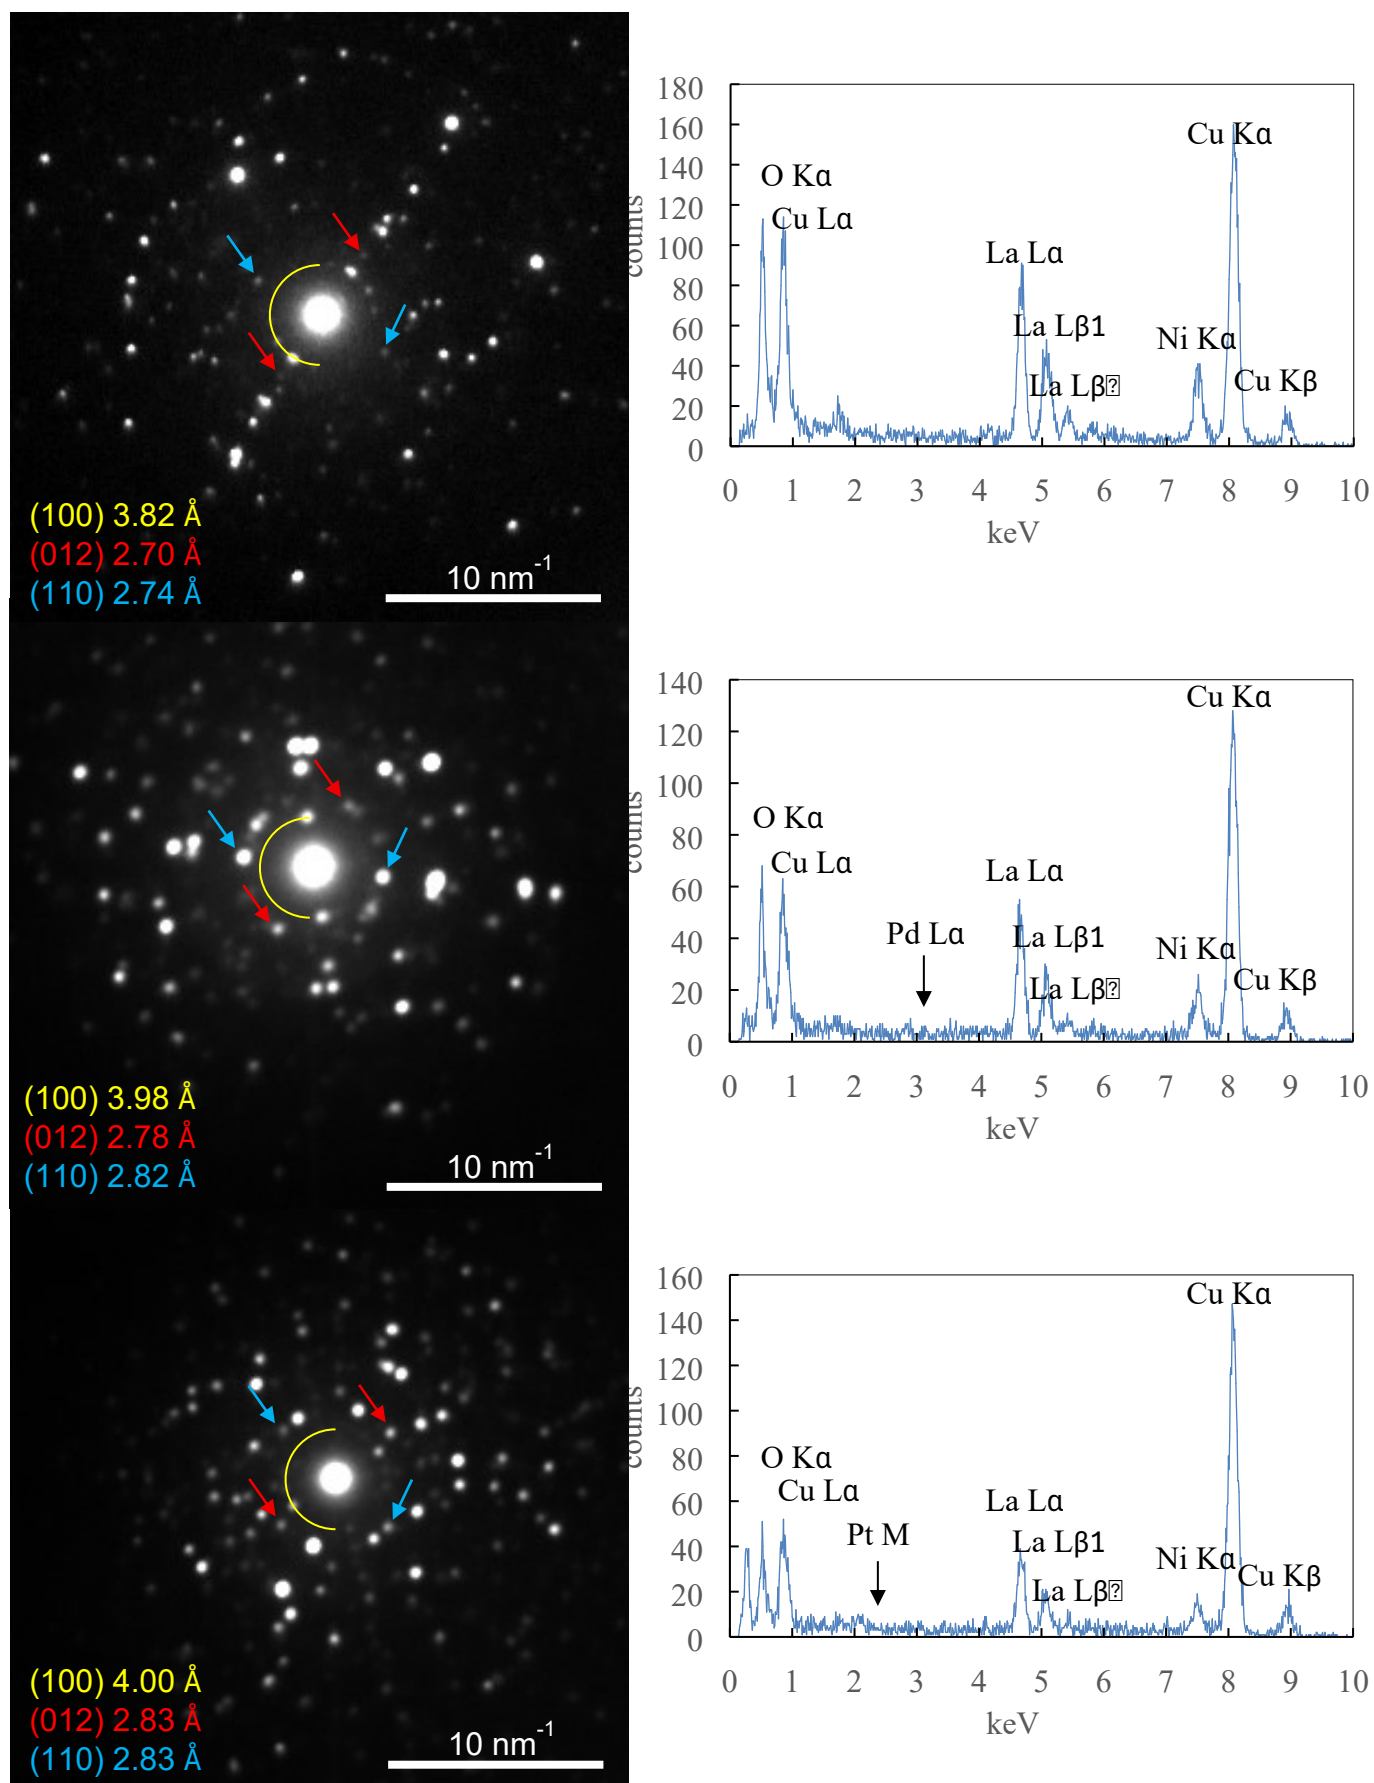

**Figure S3.** Diffraction patterns and EDS spectra of the circled area on Figure 3. Top:  $\text{LaNiO}_3$ . Middle:  $\text{LaNi}_{0.95}\text{Pd}_{0.05}\text{O}_3$ . Bottom:  $\text{LaNi}_{0.95}\text{Pt}_{0.05}\text{O}_3$ . Cu signals are due to the use of copper TEM grid.

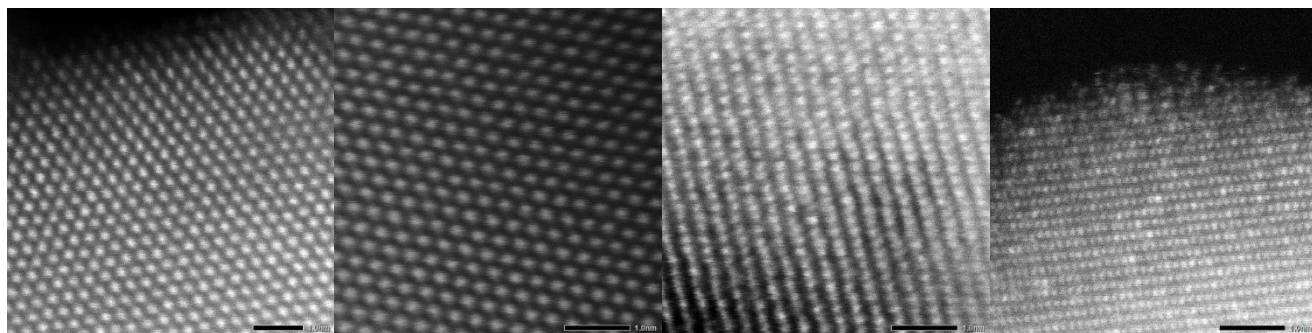

**Figure S4.** HAADF image of (left to right)  $\text{LaNiO}_3$ ,  $\text{LaNi}_{0.95}\text{Pd}_{0.05}\text{O}_3$ ,  $\text{LaNi}_{0.95}\text{Pt}_{0.05}\text{O}_3$ ,  $\text{LaNi}_{0.80}\text{Pt}_{0.20}\text{O}_3$ . Scale bar (bottom right of each image) is 1.0 nm.

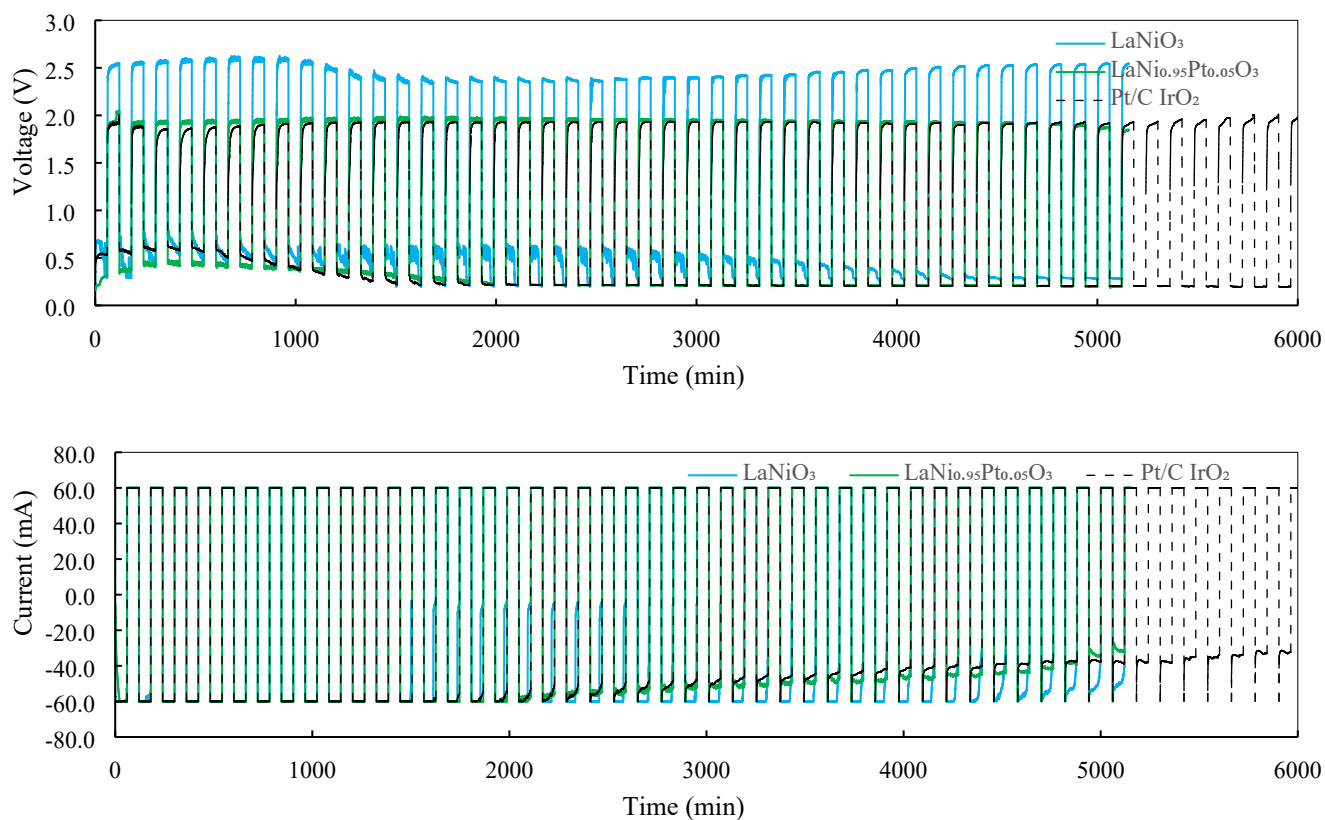

**Figure S5.** Extended plot of ZAB cycling test with  $\text{LaNiO}_3$ ,  $\text{LaNi}_{0.95}\text{Pt}_{0.05}\text{O}_3$  and  $\text{Pt/C IrO}_2$  included as reference. ZAB cycling tests for the perovskite catalysts were stopped after 43 cycles as discharging was no longer achieving  $60 \text{ mA cm}^{-2}$ .

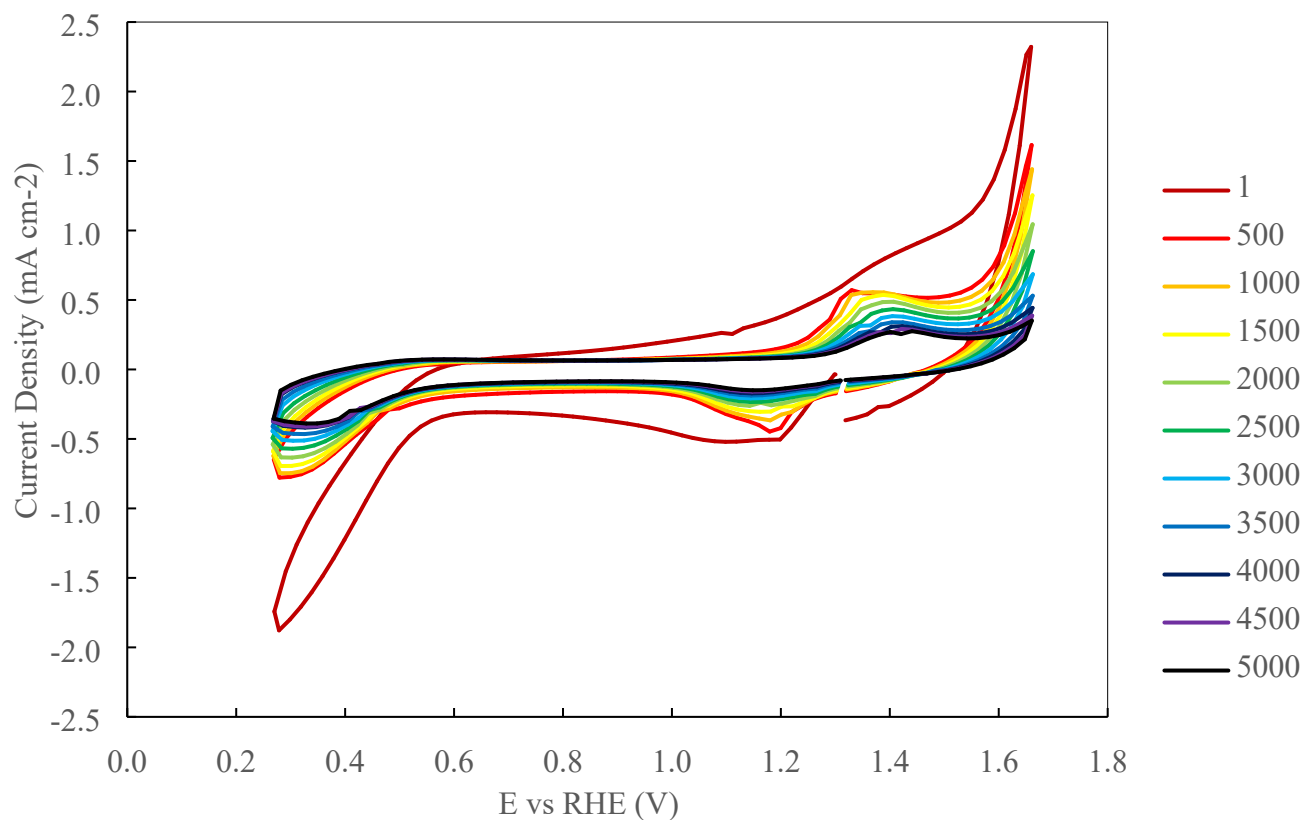

**Figure S6.** Long-term stability test by CV for  $\text{LaNiO}_3$ . Cycle numbers from 1 to 5000 are indicated by the colours in the legend.

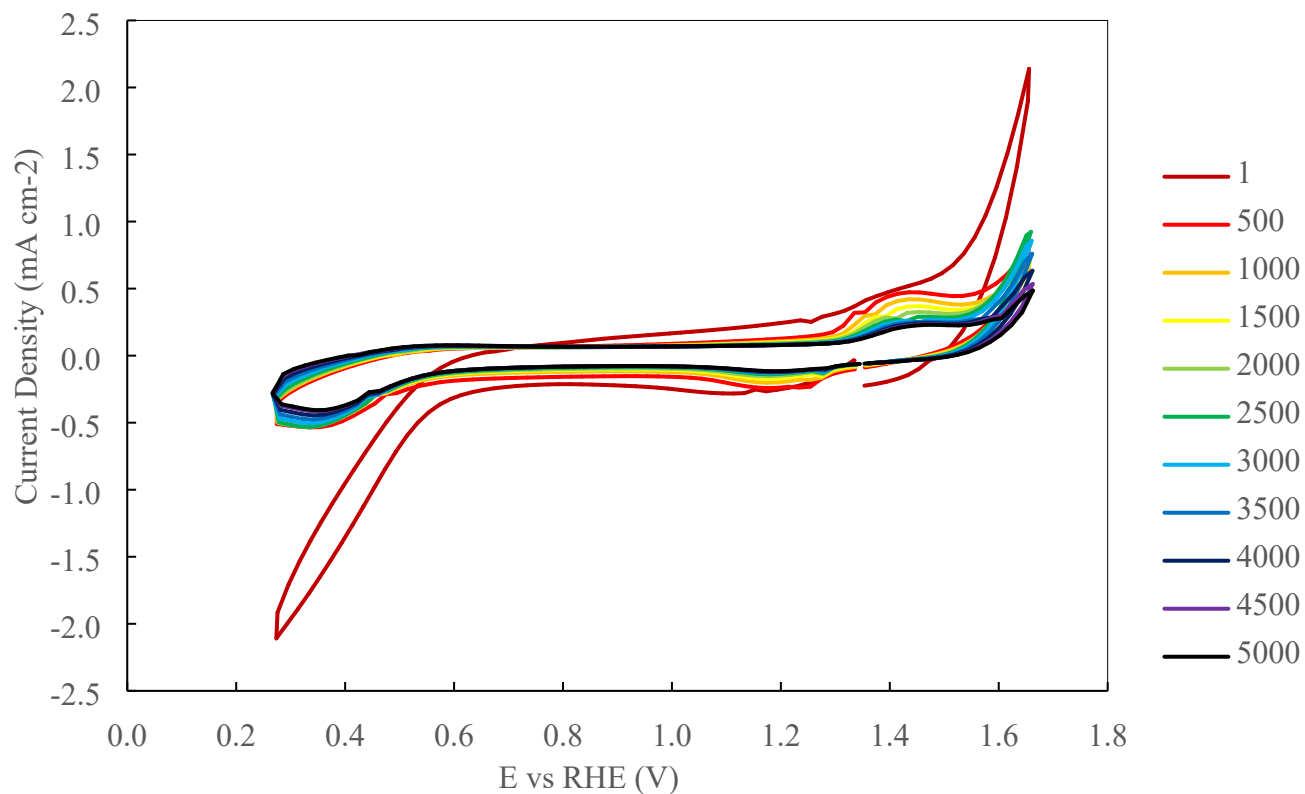

**Figure S7.** Long-term stability test by CV for  $\text{LaNi}_{0.95}\text{Pt}_{0.05}\text{O}_3$ . Cycle numbers from 1 to 5000 are indicated by the colours in the legend.

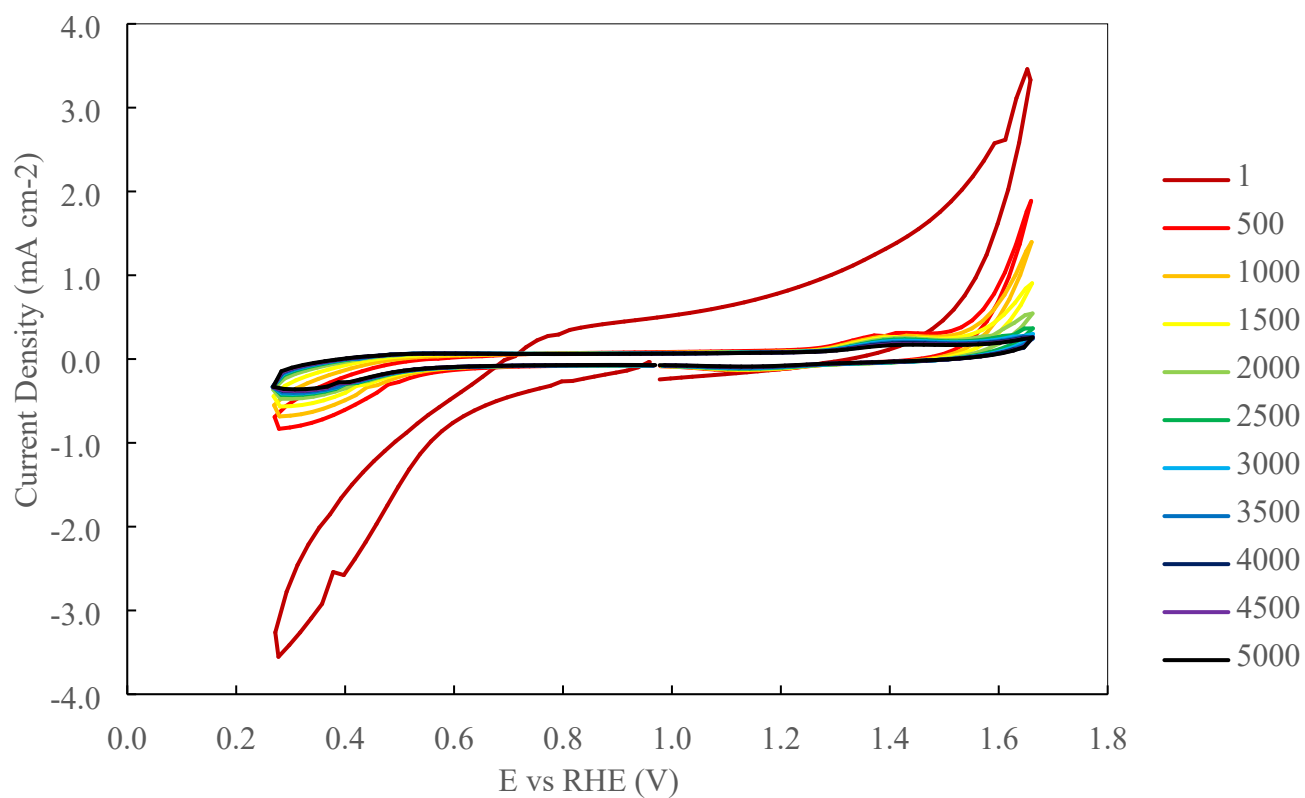

**Figure S8.** Long-term stability test by CV for reference catalyst Pt/C + IrO<sub>2</sub>. Cycle numbers from 1 to 5000 are indicated by the colours in the legend.

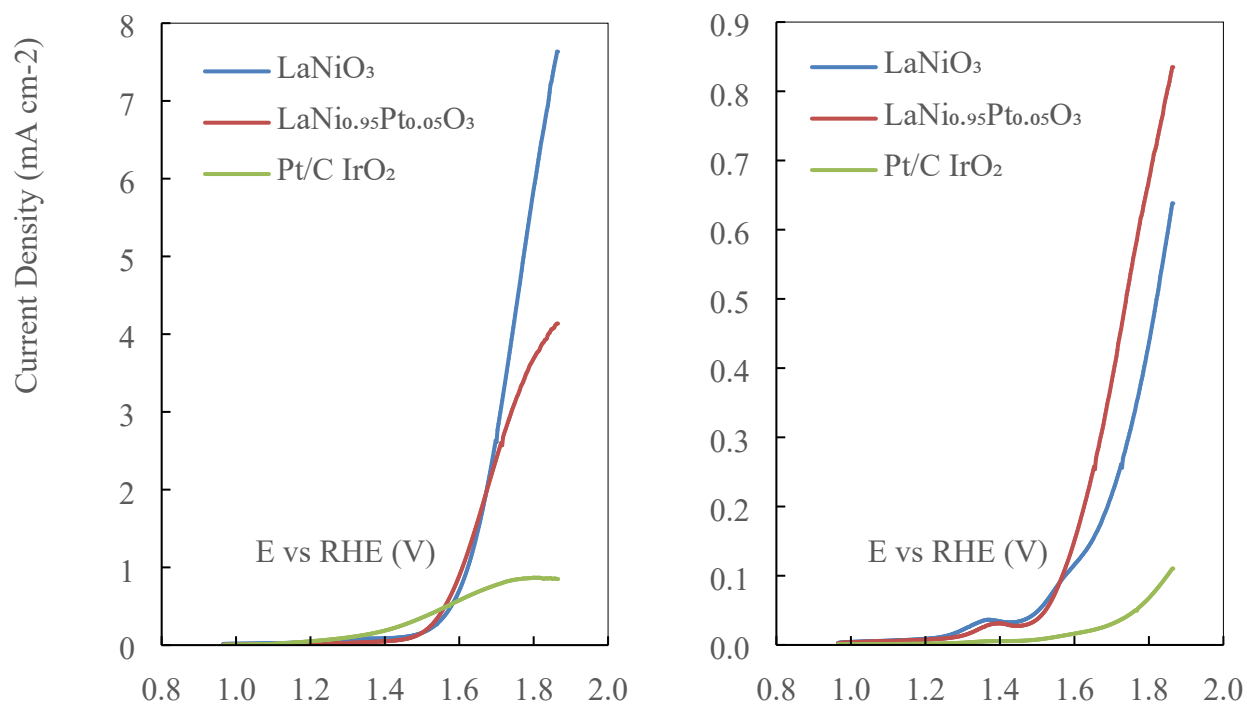

**Figure S9.** OER LSV of LaNiO<sub>3</sub> (blue), LaNi<sub>0.95</sub>Pt<sub>0.05</sub>O<sub>3</sub> (red) and Pt/C + IrO<sub>2</sub> (green) before and after long-term stability tests.

## 1. Goldschmidt Tolerance Factor

$$t = \frac{r_A + r_O}{\sqrt{2}(r_B + r_O)}$$

$r_A$  is the radius of the A cation.

$r_B$  is the radius of the B cation.

$r_O$  is the radius of the anion (usually oxygen).

**Table S1.** Ionic radii and calculated Goldschmidt Tolerance Factor for each sample

| Sample                                                 | $r_A$ | $r_{B1}$ | $r_{B2}$ | $r_{Bavg}$ | $r_O$ | t      |
|--------------------------------------------------------|-------|----------|----------|------------|-------|--------|
| LaNiO <sub>3</sub>                                     | 1.36  | 0.56     | -        | 0.56       | 1.40  | 0.9957 |
| LaNi <sub>0.95</sub> Pd <sub>0.05</sub> O <sub>3</sub> | 1.36  | 0.56     | 0.615    | 0.56275    | 1.40  | 0.9943 |
| LaNi <sub>0.95</sub> Pt <sub>0.05</sub> O <sub>3</sub> | 1.36  | 0.56     | 0.625    | 0.56325    | 1.40  | 0.9941 |
| LaNi <sub>0.80</sub> Pt <sub>0.20</sub> O <sub>3</sub> | 1.36  | 0.56     | 0.625    | 0.573      | 1.40  | 0.9892 |

units: Å

## 2. ORR Mechanism determination with Rotating Ring Disc Electrode (RRDE)

In a rotating ring disc electrode (RRDE) setup, the selectivity of ORR mechanism is represented by the Electron Transfer Number,  $n$ , as follows:

$$n = \frac{4I_d N}{I_d N + I_r}$$

where  $I_d$  is current at the disc electrode,  $I_r$  is current at the ring electrode, and  $N$  is the collection efficiency which is dependent on and specific to the geometry of the RRDE. Collection efficiency,  $N$ , has been determined in preliminary tests using potassium ferrocyanide( $[\text{Fe}(\text{CN})_6]^{4-}$ )/ferricyanide( $[\text{Fe}(\text{CN})_6]^{3-}$ ) to be 0.48.



### 3. Fitted EXAFS parameters

**Table S2.** Structural parameters by EXAFS fitting of  $\text{LaNiO}_3$ ,  $\text{LaNi}_{0.95}\text{Pt}_{0.05}\text{O}_3$  and  $\text{LaNi}_{0.95}\text{Pd}_{0.05}\text{O}_3$  based on the Ni-O coordination number of 6 and La-O coordination number of 12.

| Sample                                         | Path | N   | $S_0^2$ | $\sigma^2$ | $E_0$  | R       |
|------------------------------------------------|------|-----|---------|------------|--------|---------|
| $\text{LaNiO}_3$                               | Ni-O | 6.0 | 0.602   | 0.00243    | -2.516 | 1.92920 |
| $\text{LaNi}_{0.95}\text{Pt}_{0.05}\text{O}_3$ | Ni-O | 6.0 | 0.601   | 0.00159    | -2.742 | 1.93886 |
| $\text{LaNi}_{0.95}\text{Pd}_{0.05}\text{O}_3$ | Ni-O | 6.0 | 0.571   | 0.00238    | -3.888 | 1.93932 |

  

| Sample                                         | Path | N    | $S_0^2$ | $\sigma^2$ | $E_0$  | R       |
|------------------------------------------------|------|------|---------|------------|--------|---------|
| $\text{LaNiO}_3$                               | La-O | 12.0 | 0.850   | 0.00211    | 1.353  | 2.98411 |
| $\text{LaNi}_{0.95}\text{Pt}_{0.05}\text{O}_3$ | La-O | 12.0 | 0.750   | 0.00119    | 1.725  | 2.98765 |
| $\text{LaNi}_{0.95}\text{Pd}_{0.05}\text{O}_3$ | La-O | 12.0 | 0.750   | 0.00415    | -0.287 | 2.94876 |

$S_0^2$  – Passive Electron Reduction Factor

$\sigma^2$  – Mean-Square Displacement (also known as Debye-Waller factor) representing disorder

$E_0$  – Energy Shift

R – Bond Distance
